# Supplementary material for: Arabidopsis PARC6 Is Critical for Plastid Morphogenesis in Pavement, Trichome, and Guard Cells in Leaf Epidermis
Source: PubMed Central journal article supplement (PMC6974557; doi:10.3389/fpls.2019.01665), 2020-01-15
Supplement: DataSheet_1.pdf [file DataSheet_1.pdf]

*Supplementary Material*

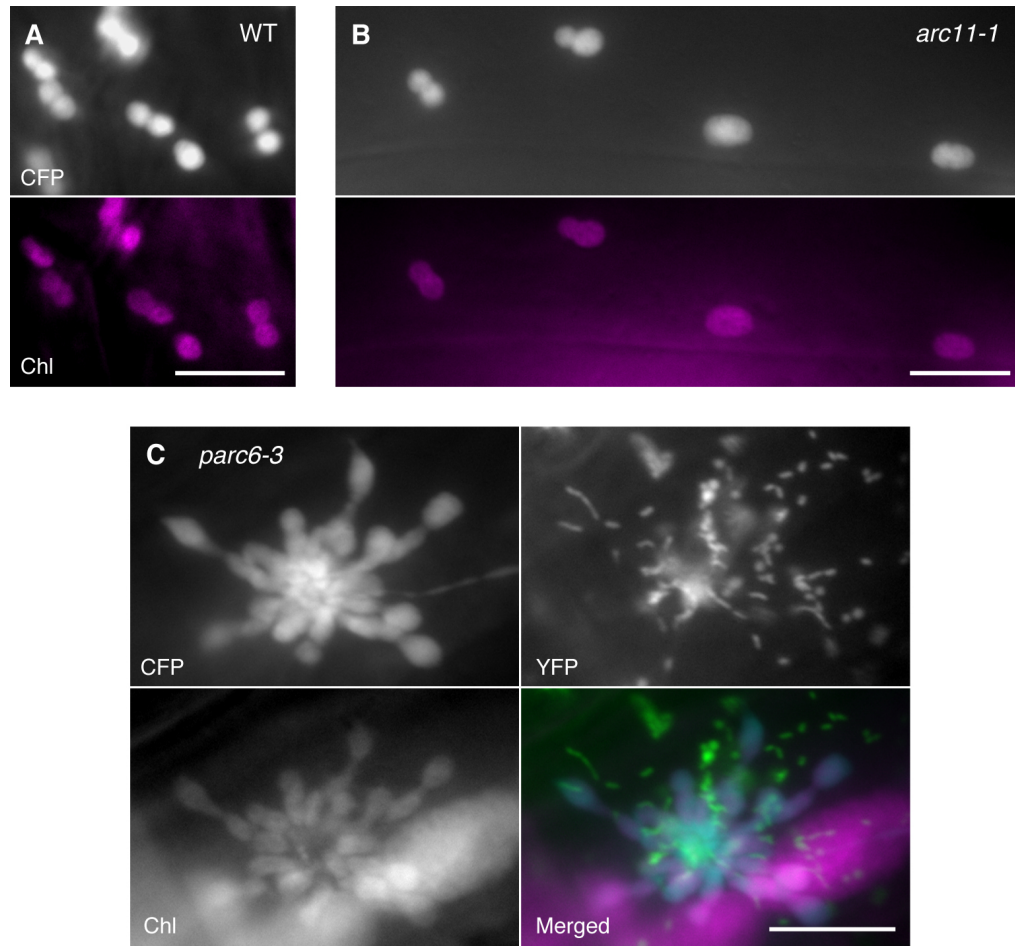

**Supplementary Figure S1.** Morphology of plastids in leaf epidermal pavement cells of *arc11* and *parc6* mutants. (A–C) Images of pavement cells in the 3<sup>rd</sup> and 4<sup>th</sup> leaf petioles of 2-week-old wild-type (WT) (A), *arc11-1* (B) and *parc6-3* (C) seedlings. Images of stroma-targeted CFP, matrix-targeted YFP or chlorophyll autofluorescence (chl), and a merged image of CFP (cyan), YFP (green) and chl (magenta) (C) are shown. Scale bar = 10  $\mu$ m.
