# Supplementary material for: Arabidopsis PARC6 Is Critical for Plastid Morphogenesis in Pavement, Trichome, and Guard Cells in Leaf Epidermis
Source: PubMed Central journal article supplement (PMC6974557; doi:10.3389/fpls.2019.01665), 2020-01-15
Supplement: DataSheet_2.pdf [file DataSheet_2.pdf]

*Supplementary Material*

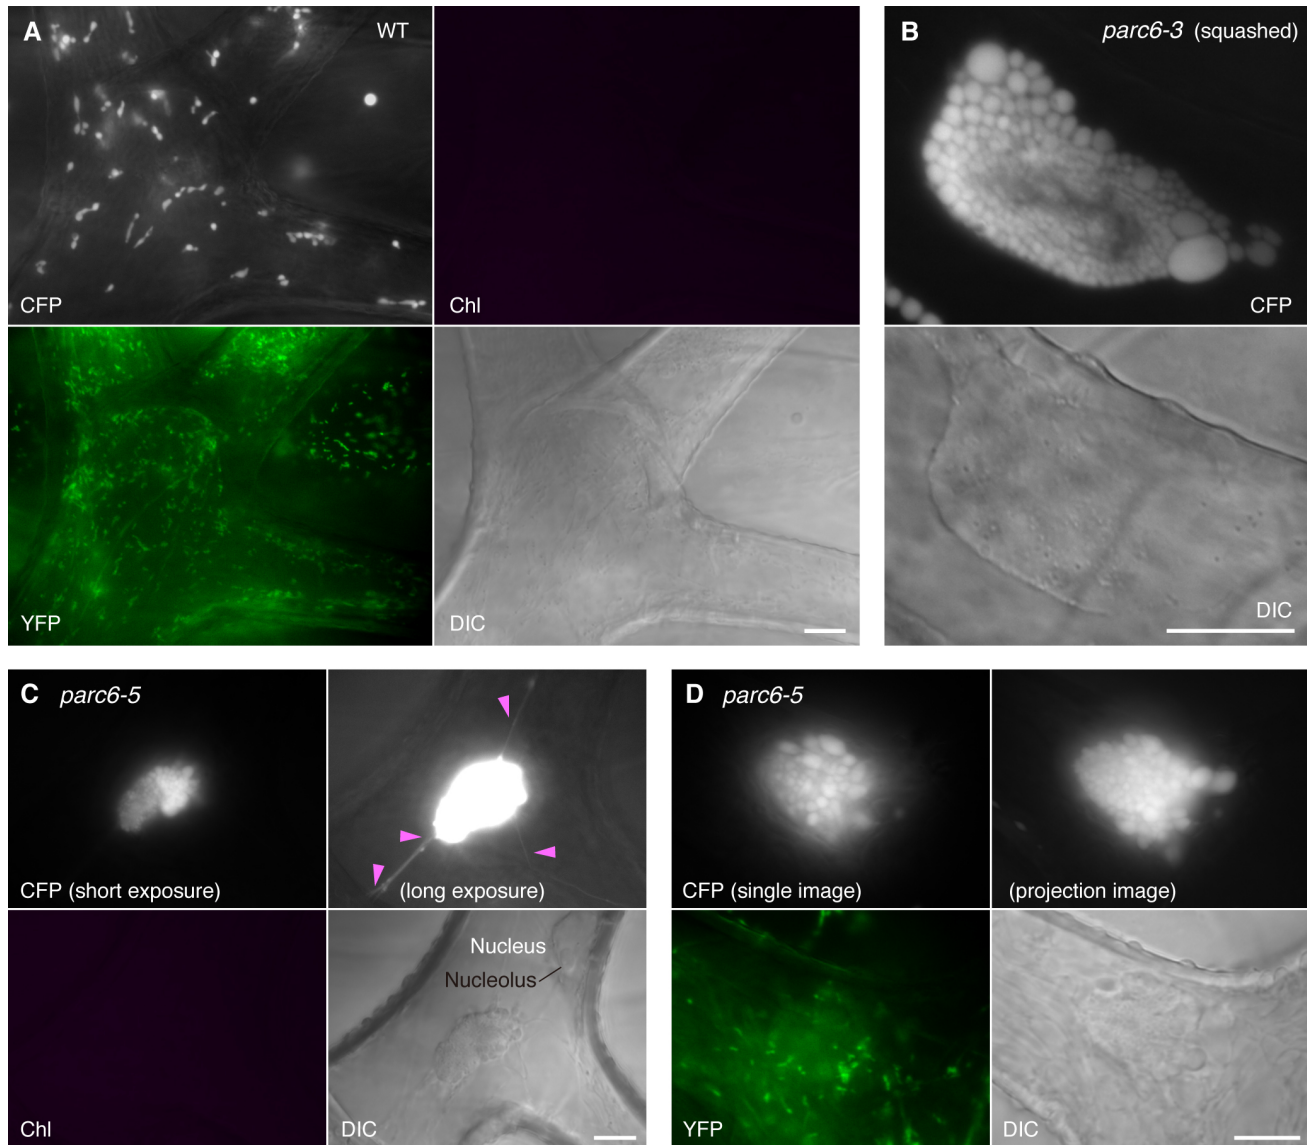

**Supplementary Figure S2.** Morphology of plastids in leaf trichome cells of *parc6* mutants. (A–D) Images of mature trichomes in leaf petioles of WT (A), *parc6-3* (B), and *parc6-5* (C, D) seedlings. The 3<sup>rd</sup> and 4<sup>th</sup> leaves of 2-week-old seedlings were mainly observed. Images of stroma-targeted CFP, matrix-targeted YFP (green), chlorophyll autofluorescence (magenta) or DIC are shown. Grape-like plastid aggregations were observed in a slightly squashed cell (B), with a different exposure time (C), or at distinct foci (D) (a projection image constructed from four images). Arrowheads indicate stromules. Scale bar = 10  $\mu$ m.
