# Supplementary material for: Arabidopsis PARC6 Is Critical for Plastid Morphogenesis in Pavement, Trichome, and Guard Cells in Leaf Epidermis
Source: PubMed Central journal article supplement (PMC6974557; doi:10.3389/fpls.2019.01665), 2020-01-15
Supplement: DataSheet_4.pdf [file DataSheet_4.pdf]

## Supplementary Material

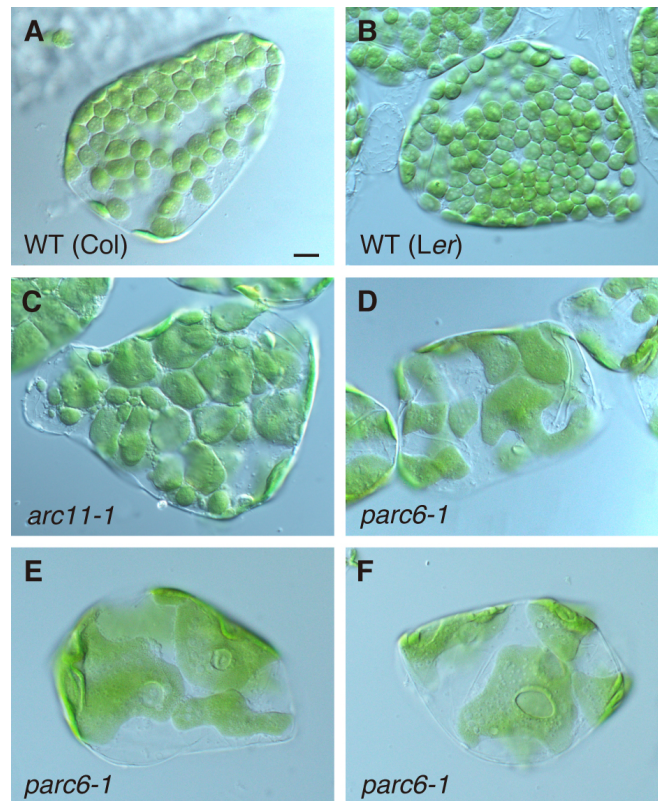

**Supplementary Figure S4.** Morphology of plastids in leaf mesophyll cells of *arc11* and *parc6* mutants. (A–F) Images of mesophyll cells in leaf blades of WT (Col) (A), WT (Ler) (B), *arc11-1* (C), and *parc6-1* (D–F) seedlings. Scale bar = 10  $\mu$ m.
