# Supplementary material for: Arabidopsis PARC6 Is Critical for Plastid Morphogenesis in Pavement, Trichome, and Guard Cells in Leaf Epidermis
Source: PubMed Central journal article supplement (PMC6974557; doi:10.3389/fpls.2019.01665), 2020-01-15
Supplement: DataSheet_5.pdf [file DataSheet_5.pdf]

*Supplementary Material*

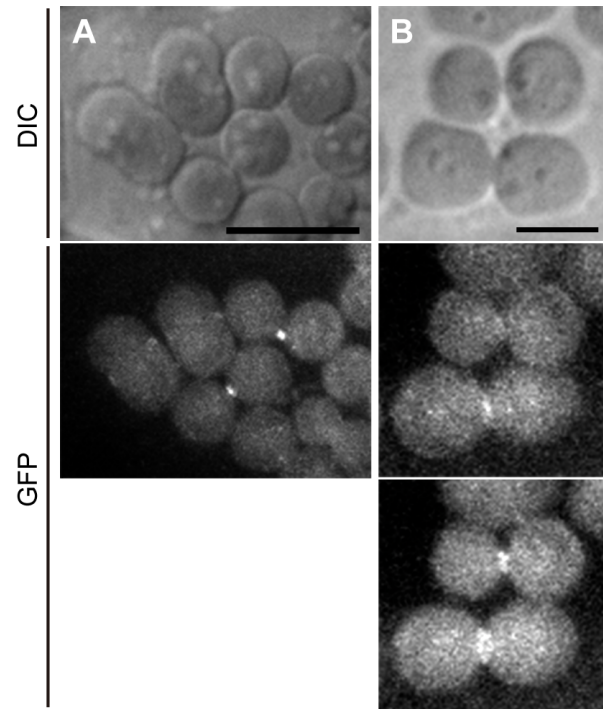

**Supplementary Figure S5.** Analysis of PARC6-GFP localization in leaf cells. **(A, B)** Images of chloroplasts in leaf petioles of 2-week-old seedlings of *parc6-4* complementation lines. Images of full-length PARC6-GFP and DIC in cortex cells are shown. Scale bar: 10  $\mu\text{m}$  **(A)** and 5  $\mu\text{m}$  **(B)**.
